# Supplementary material
Source: PubMed Central journal article supplement (PMC6400245)
Supplement: jamaoncol-4-1675-s001.pdf [file jamaoncol-4-1675-s001.pdf]

## Supplementary Online Content

Barnard ME, Poole EM, Curhan GC, et al. Association of analgesic use with risk of ovarian cancer in the Nurses' Health Studies. *JAMA Oncol*. Published online October 4, 2018. doi:10.1001/jamaoncol.2018.4149

**eTable 1.** Age-Standardized Characteristics (% or Mean [SD]) of Person-Years Contributed by Women in the Nurses' Health Studies (1980-2015)

**eTable 2.** Analgesic Use and Risk of Ovarian Cancer in the Nurses' Health Studies, by Menopausal Status at the Time of Analgesic Assessment

**eTable 3.** Analgesic Use and Risk of Ovarian Cancer in the Nurses' Health Studies, Further Adjusted for Inflammatory Factors

**eTable 4.** Aspirin or NSAID Use and Risk of Ovarian Cancer in the Nurses' Health Studies, by Tumor Histotype

**eTable 5.** Acetaminophen and Risk of Ovarian Cancer in the Nurses' Health Studies, by Tumor Histotype

This supplementary material has been provided by the authors to give readers additional information about their work.

**eTable 1. Age-standardized characteristics (% or mean [SD]) of person-years contributed by women in the Nurses' Health Studies (1980-2015)**

|                                                | Nurses' Health Study (n= 93,664) |                              |                                   | Nurses' Health Study II (n=111,834) |                              |                                 |
|------------------------------------------------|----------------------------------|------------------------------|-----------------------------------|-------------------------------------|------------------------------|---------------------------------|
|                                                | No Aspirin<br>(298,000 PY)       | Past Aspirin<br>(440,187 PY) | Current Aspirin<br>(1,041,385 PY) | No Aspirin<br>(1,221,705 PY)        | Past Aspirin<br>(275,753 PY) | Current Aspirin<br>(387,542 PY) |
| Current NSAIDs, %                              | 22.7                             | 46.1                         | 35.6                              | 36.5                                | 50.6                         | 50.3                            |
| Current acetaminophen, %                       | 28.6                             | 37.9                         | 29.8                              | 22.3                                | 26.5                         | 37.1                            |
| Age, years <sup>a</sup>                        | 51.0 (9.8)                       | 61.7 (10.0)                  | 58.7 (11.3)                       | 41.0 (7.6)                          | 48.8 (6.8)                   | 47.9 (8.2)                      |
| Non-Hispanic White Race/Ethnicity, %           | 92.7                             | 93.6                         | 93.9                              | 92.6                                | 94.2                         | 93.7                            |
| Postmenopausal, %                              | 68.8                             | 68.4                         | 68.4                              | 18.5                                | 19.0                         | 19.9                            |
| Tubal ligation, %                              | 13.5                             | 23.4                         | 19.0                              | 22.8                                | 22.8                         | 24.7                            |
| Hysterectomy, %                                | 20.0                             | 20.4                         | 20.3                              | 7.0                                 | 7.9                          | 9.2                             |
| Family history of breast or ovarian cancer, %  | 12.9                             | 15.4                         | 14.0                              | 11.3                                | 12.3                         | 11.2                            |
| Parous, %                                      | 94.4                             | 95.1                         | 95.0                              | 80.6                                | 77.3                         | 75.8                            |
| Number of children <sup>b</sup>                | 3.2 (1.6)                        | 3.1 (1.4)                    | 3.2 (1.5)                         | 2.3 (1.0)                           | 2.2 (0.9)                    | 2.2 (0.9)                       |
| Ever used OCs, %                               | 40.3                             | 57.6                         | 50.9                              | 85.9                                | 89.2                         | 89.0                            |
| Duration of OC use (years) <sup>c</sup>        | 4.2 (3.6)                        | 4.0 (3.8)                    | 4.0 (3.9)                         | 5.1 (4.6)                           | 6.0 (5.2)                    | 5.5 (4.9)                       |
| Estrogen HT use, % <sup>d</sup>                | 20.6                             | 24.1                         | 23.1                              | 7.9                                 | 8.9                          | 9.0                             |
| Estrogen HT use (years) <sup>e</sup>           | 6.9 (8.9)                        | 6.8 (5.8)                    | 6.5 (6.1)                         | 4.1 (5.5)                           | 4.3 (3.0)                    | 4.2 (2.8)                       |
| Estrogen-progestin HT use, % <sup>d</sup>      | 14.7                             | 32.4                         | 25.8                              | 29.4                                | 29.8                         | 31.5                            |
| Estrogen-progestin HT use (years) <sup>e</sup> | 5.6 (5.9)                        | 5.4 (3.7)                    | 5.6 (4.0)                         | 3.5 (3.8)                           | 3.6 (2.3)                    | 3.6 (2.2)                       |
| Other HT use, % <sup>d</sup>                   | 19.1                             | 21.3                         | 21.3                              | 9.7                                 | 10.9                         | 9.3                             |
| Other HT use (years) <sup>e</sup>              | 3.3 (4.7)                        | 3.0 (2.6)                    | 3.1 (2.9)                         | 2.0 (2.3)                           | 2.1(1.3)                     | 2.1 (1.3)                       |
| Current Smoker, %                              | 19.8                             | 14.5                         | 17.0                              | 8.9                                 | 9.7                          | 11.9                            |
| Body mass index (kg/m <sup>2</sup> )           | 25.0 (4.7)                       | 26.1 (5.3)                   | 25.9 (5.1)                        | 25.7 (5.8)                          | 26.4 (6.2)                   | 26.7 (6.5)                      |
| Waist circumference (cm)                       | 82.4(16.3)                       | 83.2(12.6)                   | 83.5(12.9)                        | 81.3(14.7)                          | 81.3(13.4)                   | 83.5(14.1)                      |
| Physical activity (MET-hrs/week)               | 16.9 (22.5)                      | 16.4 (16.2)                  | 16.8 (16.6)                       | 22.0 (25.8)                         | 22.5 (23.9)                  | 22.4 (26.4)                     |
| Sedentary Behavior (hrs/week)                  |                                  |                              |                                   |                                     |                              |                                 |

|                                         |      |      |      |      |      |      |
|-----------------------------------------|------|------|------|------|------|------|
| - 0-9, %                                | 13.0 | 11.0 | 12.1 | 10.7 | 6.7  | 10.1 |
| - 10-19, %                              | 22.8 | 23.0 | 23.3 | 31.0 | 29.8 | 29.7 |
| - 20-39, %                              | 33.6 | 35.1 | 34.1 | 34.6 | 35.9 | 34.7 |
| - 40+, %                                | 30.5 | 30.9 | 30.4 | 23.6 | 27.7 | 25.4 |
| Inflammatory diet score (quintiles)     |      |      |      |      |      |      |
| - Q1, %                                 | 23.3 | 29.9 | 29.1 | 24.9 | 27.8 | 25.6 |
| - Q2, %                                 | 15.4 | 18.2 | 17.4 | 16.4 | 16.5 | 15.8 |
| - Q3, %                                 | 14.3 | 15.9 | 15.3 | 17.9 | 16.5 | 17.0 |
| - Q4, %                                 | 14.0 | 14.4 | 13.8 | 18.0 | 16.6 | 17.4 |
| - Q5, %                                 | 33.0 | 21.6 | 24.4 | 22.8 | 22.6 | 24.1 |
| Recent physical exam, %                 | 82.7 | 84.9 | 83.7 | 83.1 | 81.8 | 85.0 |
| Beta blockers, %                        | 10.5 | 11.0 | 15.2 | 3.3  | 4.4  | 7.1  |
| Thiazide diuretics, %                   | 10.8 | 11.2 | 13.0 | 3.4  | 4.5  | 6.5  |
| Calcium channel blockers, %             | 6.2  | 6.4  | 8.8  | 2.1  | 2.5  | 4.8  |
| History of hypertension, %              | 28.2 | 34.8 | 36.8 | 12.4 | 16.7 | 21.8 |
| History of high cholesterol, %          | 28.2 | 41.1 | 38.1 | 23.7 | 29.5 | 32.9 |
| MI or angina, %                         | 4.8  | 5.0  | 8.1  | 1.0  | 1.7  | 2.9  |
| Stroke, %                               | 1.1  | 1.2  | 1.5  | 0.3  | 0.7  | 1.3  |
| History of diabetes, %                  | 4.4  | 5.6  | 6.5  | 1.8  | 2.6  | 4.8  |
| Rheumatoid arthritis, %                 | 6.5  | 7.8  | 6.7  | 1.9  | 2.8  | 2.6  |
| Other arthritis, %                      | 28.2 | 35.9 | 33.4 | 13.3 | 16.4 | 17.7 |
| Non-GI autoimmune disease, %            | 7.3  | 10.3 | 8.4  | 3.3  | 4.4  | 4.5  |
| Ulcerative colitis, %                   | 1.6  | 1.6  | 1.3  | 1.5  | 1.7  | 1.6  |
| History of gastric or duodenal ulcer, % | 10.8 | 9.0  | 6.6  | 4.0  | 5.3  | 5.2  |
| Irregular Menstruation, %               | 12.9 | 13.4 | 12.8 | 22.8 | 23.4 | 23.2 |
| History of Endometriosis <sup>f</sup>   | -    | -    | -    | 6.5  | 9.1  | 7.9  |

<sup>a</sup>Value is not age-adjusted

<sup>b</sup>Number of children among parous women

<sup>c</sup>Duration of OC use among past and current OC users

<sup>d</sup>HT use among postmenopausal women

<sup>e</sup>Duration of HT use among past and current HT users

<sup>f</sup>Endometriosis evaluated in the Nurses' Health Study II only

**eTable 2. Analgesic use and risk of ovarian cancer in the Nurses' Health Studies, by menopausal status at the time of analgesic assessment**

|                                                          | Aspirin<br>(1980-2015) |                                                |                             |                                                | NSAIDs<br>(1989-2015) |                                                |                             |                                                | Acetaminophen<br>(1989-2015) |                                                |                             |                                                |
|----------------------------------------------------------|------------------------|------------------------------------------------|-----------------------------|------------------------------------------------|-----------------------|------------------------------------------------|-----------------------------|------------------------------------------------|------------------------------|------------------------------------------------|-----------------------------|------------------------------------------------|
|                                                          | Premenopausal          |                                                | Postmenopausal <sup>a</sup> |                                                | Premenopausal         |                                                | Postmenopausal <sup>a</sup> |                                                | Premenopausal                |                                                | Postmenopausal <sup>a</sup> |                                                |
|                                                          | Cases                  | Multivariate-adjusted HR (95% CI) <sup>b</sup> | Cases                       | Multivariate-adjusted HR (95% CI) <sup>b</sup> | Cases                 | Multivariate-adjusted HR (95% CI) <sup>b</sup> | Cases                       | Multivariate-adjusted HR (95% CI) <sup>b</sup> | Cases                        | Multivariate-adjusted HR (95% CI) <sup>b</sup> | Cases                       | Multivariate-adjusted HR (95% CI) <sup>b</sup> |
| <b>Duration (years)</b>                                  |                        |                                                |                             |                                                |                       |                                                |                             |                                                |                              |                                                |                             |                                                |
| <1                                                       | 358                    | 1.00 (ref)                                     | 359                         | 1.00 (ref)                                     | 155                   | 1.00 (ref)                                     | 298                         | 1.00 (ref)                                     | 197                          | 1.00 (ref)                                     | 458                         | 1.00 (ref)                                     |
| 1-4                                                      | 153                    | 1.01<br>(0.83, 1.23)                           | 94                          | 1.14<br>(0.90, 1.44)                           | 143                   | 1.08<br>(0.85, 1.36)                           | 193                         | 1.70<br>(1.41, 2.04)                           | 135                          | 0.93<br>(0.74, 1.16)                           | 65                          | 1.07<br>(0.80, 1.44)                           |
| 5-9                                                      | 101                    | 1.15<br>(0.90, 1.45)                           | 119                         | 1.39<br>(1.13, 1.72)                           | 85                    | 1.15<br>(0.86, 1.54)                           | 129                         | 1.65<br>(1.33, 2.04)                           | 67                           | 1.12<br>(0.84, 1.50)                           | 25                          | 0.97<br>(0.62, 1.51)                           |
| 10-15 <sup>c</sup>                                       | 30                     | 0.90<br>(0.61, 1.32)                           | 89                          | 1.40<br>(1.11, 1.78)                           | 37                    | 1.20<br>(0.80, 1.80)                           | 88                          | 1.80<br>(1.39, 2.33)                           | 21                           | 1.12<br>(0.70, 1.80)                           | --                          | --                                             |
| ≥15                                                      | 93                     | 1.35<br>(1.05, 1.72)                           | 189                         | 1.42<br>(1.18, 1.71)                           | --                    | --                                             | --                          | --                                             | --                           | --                                             | --                          | --                                             |
| p-trend                                                  |                        | 0.04                                           |                             | <0.01                                          |                       | 0.32                                           |                             | <0.01                                          |                              | 0.40                                           |                             | 0.89                                           |
|                                                          |                        |                                                |                             |                                                |                       |                                                |                             |                                                |                              |                                                |                             |                                                |
| <b>Days per week (cumulative average)<sup>d</sup></b>    |                        |                                                |                             |                                                |                       |                                                |                             |                                                |                              |                                                |                             |                                                |
| <2                                                       | 439                    | 1.00 (ref)                                     | 350                         | 1.00 (ref)                                     | 261                   | 1.00 (ref)                                     | 447                         | 1.00 (ref)                                     | 305                          | 1.00 (ref)                                     | 499                         | 1.00 (ref)                                     |
| 3-4                                                      | 91                     | 1.13<br>(0.90, 1.42)                           | 221                         | 1.19<br>(1.00, 1.41)                           | 70                    | 1.12<br>(0.85, 1.46)                           | 97                          | 1.09<br>(0.87, 1.37)                           | 39                           | 1.11<br>(0.79, 1.55)                           | 78                          | 1.13<br>(0.89, 1.44)                           |
| ≥5                                                       | 29                     | 1.14<br>(0.78, 1.67)                           | 99                          | 0.92<br>(0.73, 1.15)                           | 24                    | 1.41<br>(0.92, 2.16)                           | 57                          | 1.21<br>(0.91, 1.60)                           | 7                            | 1.21<br>(0.57, 2.58)                           | 20                          | 0.82<br>(0.52, 1.28)                           |
| p-trend                                                  |                        | 0.27                                           |                             | 0.97                                           |                       | 0.11                                           |                             | 0.16                                           |                              | 0.45                                           |                             | 0.93                                           |
|                                                          |                        |                                                |                             |                                                |                       |                                                |                             |                                                |                              |                                                |                             |                                                |
| <b>Tablets per week (cumulative average)<sup>d</sup></b> |                        |                                                |                             |                                                |                       |                                                |                             |                                                |                              |                                                |                             |                                                |
| <1                                                       | 330                    | 1.00 (ref)                                     | 234                         | 1.00 (ref)                                     | 44                    | 1.00 (ref)                                     | 140                         | 1.00 (ref)                                     | 72                           | 1.00 (ref)                                     | 164                         | 1.00 (ref)                                     |
| 1-3                                                      | 159                    | 1.14<br>(0.93, 1.39)                           | 276                         | 1.32<br>(1.10, 1.57)                           | 18                    | 0.61<br>(0.35, 1.07)                           | 55                          | 1.32<br>(0.96, 1.83)                           | 28                           | 1.34<br>(0.83, 2.14)                           | 65                          | 1.33<br>(0.97, 1.81)                           |
| 4-5                                                      | 47                     | 0.99<br>(0.72, 1.34)                           | 84                          | 1.27<br>(0.98, 1.63)                           | 14                    | 0.73<br>(0.40, 1.34)                           | 37                          | 1.54<br>(1.06, 2.24)                           | 9                            | 0.78<br>(0.33, 1.82)                           | 29                          | 1.21<br>(0.77, 1.89)                           |

|         |    |                      |    |                      |    |                      |    |                      |   |                      |    |                      |
|---------|----|----------------------|----|----------------------|----|----------------------|----|----------------------|---|----------------------|----|----------------------|
| 6-9     | 36 | 1.13<br>(0.80, 1.61) | 74 | 1.24<br>(0.95, 1.62) | 18 | 1.77<br>(1.00, 3.12) | 20 | 1.16<br>(0.72, 1.88) | 4 | 1.19<br>(0.43, 3.33) | 19 | 1.29<br>(0.79, 2.10) |
| ≥10     | 64 | 1.22<br>(0.93, 1.60) | 56 | 0.91<br>(0.68, 1.23) | 32 | 1.32<br>(0.82, 2.13) | 59 | 1.44<br>(1.05, 1.97) | 7 | 0.49<br>(0.15, 1.59) | 39 | 1.45<br>(1.00, 2.11) |
| p-trend |    | 0.18                 |    | 0.76                 |    | 0.03                 |    | 0.03                 |   | 0.34                 |    | 0.05                 |

<sup>a</sup>Analysis restricted to postmenopausal cases

<sup>b</sup>Models allowed for variation in baseline hazards by cohort, age in months (continuous) and calendar years (continuous), and adjusted for menopausal status, parity (ever/never and number of children), duration of oral contraceptive use (never, <1, 1 to 5, >5 years), duration of postmenopausal hormone use by type, history of tubal ligation (yes, no), history of hysterectomy (yes, no), family history of breast cancer or ovarian cancer (yes, no), BMI (<20, 20 to <25, 25 to <30, ≥30)

<sup>c</sup>Top category of duration analysis for NSAIDs and acetaminophen is ≥10 years

<sup>d</sup>Cumulative averages were calculated using premenopausal or postmenopausal person-years only; aspirin cumulative average days per week follow-up 1984-2015 and NSAID cumulative average tablets per week follow-up 2000-2015

| <b>eTable 3. Analgesic use and risk of ovarian cancer in the Nurses' Health Studies, further adjusted for inflammatory factors</b> |                                     |                                  |                                                              |                                          |                                  |                                                              |                           |                                  |                                                              |
|------------------------------------------------------------------------------------------------------------------------------------|-------------------------------------|----------------------------------|--------------------------------------------------------------|------------------------------------------|----------------------------------|--------------------------------------------------------------|---------------------------|----------------------------------|--------------------------------------------------------------|
|                                                                                                                                    | <b>Low-dose Aspirin (2000-2015)</b> |                                  |                                                              | <b>Standard-dose Aspirin (2000-2015)</b> |                                  |                                                              | <b>NSAIDs (1989-2015)</b> |                                  |                                                              |
|                                                                                                                                    |                                     | <b>Main Analysis<sup>a</sup></b> | <b>Further Adjusted for Inflammatory Factors<sup>b</sup></b> |                                          | <b>Main Analysis<sup>a</sup></b> | <b>Further Adjusted for Inflammatory Factors<sup>b</sup></b> |                           | <b>Main Analysis<sup>a</sup></b> | <b>Further Adjusted for Inflammatory Factors<sup>b</sup></b> |
|                                                                                                                                    | Cases                               | HR (95% CI)                      | HR (95% CI)                                                  | Cases                                    | HR (95% CI)                      | HR (95% CI)                                                  | Cases                     | HR (95% CI)                      | HR (95% CI)                                                  |
| <b>Current use</b>                                                                                                                 |                                     |                                  |                                                              |                                          |                                  |                                                              |                           |                                  |                                                              |
| None                                                                                                                               | 287                                 | 1.00 (ref)                       | 1.00 (ref)                                                   | 276                                      | 1.00 (ref)                       | 1.00 (ref)                                                   | 106                       | 1.00 (ref)                       | 1.00 (ref)                                                   |
| Past                                                                                                                               | 22                                  | 0.65 (0.35-1.19)                 | 0.64 (0.35-1.18)                                             | 57                                       | 1.34 (0.90-1.99)                 | 1.32 (0.88-1.96)                                             | 167                       | 1.20 (0.87-1.66)                 | 1.20 (0.86-1.67)                                             |
| Current                                                                                                                            | 122                                 | 0.95 (0.70-1.27)                 | 0.94 (0.69-1.26)                                             | 91                                       | 1.28 (0.92-1.77)                 | 1.23 (0.89-1.71)                                             | 266                       | 1.32 (0.96-1.80)                 | 1.31 (0.95-1.81)                                             |
|                                                                                                                                    |                                     |                                  |                                                              |                                          |                                  |                                                              |                           |                                  |                                                              |
| <b>Duration (years)</b>                                                                                                            |                                     |                                  |                                                              |                                          |                                  |                                                              |                           |                                  |                                                              |
| <1                                                                                                                                 | 324                                 | 1.00 (ref)                       | 1.00 (ref)                                                   | 328                                      | 1.00 (ref)                       | 1.00 (ref)                                                   | 126                       | 1.00 (ref)                       | 1.00 (ref)                                                   |
| 1-4                                                                                                                                | 71                                  | 0.78 (0.53-1.14)                 | 0.77 (0.52-1.12)                                             | 88                                       | 1.19 (0.84-1.69)                 | 1.16 (0.82-1.66)                                             | 138                       | 1.23 (0.89-1.70)                 | 1.23 (0.88-1.70)                                             |
| 5-9 <sup>c</sup>                                                                                                                   | 22                                  | 0.91 (0.51-1.66)                 | 0.90 (0.50-1.64)                                             | 24                                       | 2.12 (1.21-3.69)                 | 2.00 (1.14-3.51)                                             | 150                       | 1.25 (0.90-1.73)                 | 1.23 (0.88-1.71)                                             |
| ≥10                                                                                                                                | --                                  | --                               | --                                                           | --                                       | --                               | --                                                           | 130                       | 1.22 (0.85-1.75)                 | 1.20 (0.82-1.75)                                             |
| p-trend                                                                                                                            |                                     | 0.53                             | 0.50                                                         |                                          | 0.008                            | 0.02                                                         |                           | 0.43                             | 0.52                                                         |
|                                                                                                                                    |                                     |                                  |                                                              |                                          |                                  |                                                              |                           |                                  |                                                              |
| <b>Days per week (cumulative average)</b>                                                                                          |                                     |                                  |                                                              |                                          |                                  |                                                              |                           |                                  |                                                              |
| <2                                                                                                                                 | 362                                 | 1.00 (ref)                       | 1.00 (ref)                                                   | 355                                      | 1.00 (ref)                       | 1.00 (ref)                                                   | 407                       | 1.00 (ref)                       | 1.00 (ref)                                                   |
| 3-4                                                                                                                                | 57                                  | 0.86 (0.58-1.28)                 | 0.86 (0.58-1.29)                                             | 45                                       | 1.54 (1.04-2.27)                 | 1.50 (1.01-2.22)                                             | 104                       | 0.83 (0.60-1.15)                 | 0.81 (0.58-1.13)                                             |
| ≥5                                                                                                                                 | 47                                  | 0.98 (0.66-1.46)                 | 0.96 (0.64-1.43)                                             | 36                                       | 1.34 (0.84-2.16)                 | 1.23 (0.76-1.99)                                             | 42                        | 1.30 (0.83-2.04)                 | 1.26 (0.79-2.02)                                             |
| p-trend                                                                                                                            |                                     | 0.74                             | 0.68                                                         |                                          | 0.05                             | 0.12                                                         |                           | 0.83                             | 0.96                                                         |
|                                                                                                                                    |                                     |                                  |                                                              |                                          |                                  |                                                              |                           |                                  |                                                              |
| <b>Tablets per week (cumulative average)<sup>d</sup></b>                                                                           |                                     |                                  |                                                              |                                          |                                  |                                                              |                           |                                  |                                                              |
| <1                                                                                                                                 | 320                                 | 1.00 (ref)                       | 1.00 (ref)                                                   | 316                                      | 1.00 (ref)                       | 1.00 (ref)                                                   | 171                       | 1.00 (ref)                       | 1.00 (ref)                                                   |

|                                                                                                                                                                                                                                                                                                                                                                                                                                                                                                                                                                                                                                                                                                             |     |                  |                  |     |                  |                  |     |                  |                  |
|-------------------------------------------------------------------------------------------------------------------------------------------------------------------------------------------------------------------------------------------------------------------------------------------------------------------------------------------------------------------------------------------------------------------------------------------------------------------------------------------------------------------------------------------------------------------------------------------------------------------------------------------------------------------------------------------------------------|-----|------------------|------------------|-----|------------------|------------------|-----|------------------|------------------|
| 1-3                                                                                                                                                                                                                                                                                                                                                                                                                                                                                                                                                                                                                                                                                                         | 41  | 1.04 (0.67-1.62) | 1.06 (0.68-1.65) | 38  | 1.06 (0.67-1.69) | 1.05 (0.66-1.67) | 79  | 0.99 (0.67-1.45) | 0.98 (0.66-1.45) |
| 4-5                                                                                                                                                                                                                                                                                                                                                                                                                                                                                                                                                                                                                                                                                                         | 30  | 0.96 (0.57-1.63) | 0.96 (0.56-1.63) | 21  | 1.27 (0.69-2.32) | 1.24 (0.67-2.28) | 45  | 1.22 (0.77-1.91) | 1.21 (0.76-1.90) |
| 6-9                                                                                                                                                                                                                                                                                                                                                                                                                                                                                                                                                                                                                                                                                                         | 26  | 1.11 (0.64-1.92) | 1.12 (0.65-1.94) | 21  | 2.46 (1.40-4.35) | 2.32 (1.31-4.13) | 51  | 1.52 (0.95-2.42) | 1.52 (0.94-2.44) |
| ≥10                                                                                                                                                                                                                                                                                                                                                                                                                                                                                                                                                                                                                                                                                                         | 30  | 0.89 (0.53-1.48) | 0.87 (0.52-1.46) | 27  | 1.26 (0.74-2.14) | 1.15 (0.67-1.97) | 76  | 1.21 (0.81-1.80) | 1.20 (0.79-1.81) |
| p-trend                                                                                                                                                                                                                                                                                                                                                                                                                                                                                                                                                                                                                                                                                                     |     | 0.78             | 0.74             |     | 0.05             | 0.12             |     | 0.14             | 0.18             |
| <b>Tablet-days</b>                                                                                                                                                                                                                                                                                                                                                                                                                                                                                                                                                                                                                                                                                          |     |                  |                  |     |                  |                  |     |                  |                  |
| None                                                                                                                                                                                                                                                                                                                                                                                                                                                                                                                                                                                                                                                                                                        | 287 | 1.00 (ref)       | 1.00 (ref)       | 276 | 1.00 (ref)       | 1.00 (ref)       | 199 | 1.00 (ref)       | 1.00 (ref)       |
| 1-499                                                                                                                                                                                                                                                                                                                                                                                                                                                                                                                                                                                                                                                                                                       | 21  | 1.33 (0.78-2.28) | 1.31 (0.76-2.26) | 33  | 1.04 (0.63-1.70) | 1.05 (0.64-1.73) | 59  | 1.01 (0.68-1.52) | 1.01 (0.67-1.52) |
| 500-999                                                                                                                                                                                                                                                                                                                                                                                                                                                                                                                                                                                                                                                                                                     | 6   | 0.36 (0.05-2.62) | 0.38 (0.05-2.73) | 6   | 1.08 (0.39-2.99) | 1.05 (0.38-2.91) | 18  | 0.75 (0.36-1.56) | 0.75 (0.36-1.56) |
| 1000-2499                                                                                                                                                                                                                                                                                                                                                                                                                                                                                                                                                                                                                                                                                                   | 61  | 0.93 (0.64-1.34) | 0.91 (0.63-1.31) | 53  | 1.38 (0.93-2.05) | 1.32 (0.88-1.97) | 65  | 1.17 (0.81-1.68) | 1.18 (0.81-1.72) |
| ≥2500                                                                                                                                                                                                                                                                                                                                                                                                                                                                                                                                                                                                                                                                                                       | 27  | 0.85 (0.48-1.49) | 0.84 (0.48-1.48) | 22  | 1.82 (1.02-3.23) | 1.73 (0.97-3.11) | 58  | 1.27 (0.80-2.02) | 1.30 (0.81-2.09) |
| p-trend                                                                                                                                                                                                                                                                                                                                                                                                                                                                                                                                                                                                                                                                                                     |     | 0.46             | 0.42             |     | 0.01             | 0.03             |     | 0.22             | 0.19             |
| <sup>a</sup> Models allowed for variation in baseline hazards by cohort, age in months (continuous) and calendar years (continuous), and adjusted for menopausal status, parity (ever/never and number of children), duration of oral contraceptive use (never, <1, 1 to 5, >5 years), duration of postmenopausal hormone use by type, history of tubal ligation (yes, no), history of hysterectomy (yes, no), family history of breast cancer or ovarian cancer (yes, no), BMI (<20, 20 to <25, 25 to <30, ≥30)                                                                                                                                                                                            |     |                  |                  |     |                  |                  |     |                  |                  |
| <sup>b</sup> Model a further adjusted for history of hypertension (yes, no), history of diabetes (yes, no), history of arthritis (yes, no), history of non-GI autoimmune disease (yes, no), history of ulcerative colitis (yes, no), history of gastric or duodenal ulcer (yes, no), history of myocardial infarction or angina (yes, no), history of stroke (yes, no), history of high cholesterol (yes, no), history of irregular menstruation (yes, no), waist circumference (continuous), physical activity in MET hours per week (<3, 3-8.9, 9-17.9, 18-26.9, 27+), sedentary behavior in hours per week (0-9, 10-19, 20-39, 40+), inflammatory diet score (quintiles), smoking (current, past, never) |     |                  |                  |     |                  |                  |     |                  |                  |
| <sup>c</sup> Top category for duration of low-dose aspirin and regular dose aspirin was ≥5 years                                                                                                                                                                                                                                                                                                                                                                                                                                                                                                                                                                                                            |     |                  |                  |     |                  |                  |     |                  |                  |
| <sup>d</sup> NSAID tablets per week follow-up was 2000-2015                                                                                                                                                                                                                                                                                                                                                                                                                                                                                                                                                                                                                                                 |     |                  |                  |     |                  |                  |     |                  |                  |

| <b>eTable 4. Aspirin or NSAID use and risk of ovarian cancer in the Nurses' Health Studies, by tumor histotype</b> |                            |                                                 |               |                                                 |                           |                                                 |               |                                                 |
|--------------------------------------------------------------------------------------------------------------------|----------------------------|-------------------------------------------------|---------------|-------------------------------------------------|---------------------------|-------------------------------------------------|---------------|-------------------------------------------------|
|                                                                                                                    | <b>Aspirin (1980-2015)</b> |                                                 |               |                                                 | <b>NSAIDs (1989-2015)</b> |                                                 |               |                                                 |
|                                                                                                                    | <b>Type II</b>             |                                                 | <b>Type I</b> |                                                 | <b>Type II</b>            |                                                 | <b>Type I</b> |                                                 |
|                                                                                                                    | Cases                      | Multivariable-adjusted HR (95% CI) <sup>a</sup> | Cases         | Multivariable-adjusted HR (95% CI) <sup>a</sup> | Cases                     | Multivariable-adjusted HR (95% CI) <sup>a</sup> | Cases         | Multivariable-adjusted HR (95% CI) <sup>a</sup> |
| <b>Current regular use</b>                                                                                         |                            |                                                 |               |                                                 |                           |                                                 |               |                                                 |
| None                                                                                                               | 152                        | 1.00 (ref)                                      | 93            | 1.00 (ref)                                      | 176                       | 1.00 (ref)                                      | 69            | 1.00 (ref)                                      |
| Past                                                                                                               | 176                        | 0.86 (0.66-1.10)                                | 60            | 1.06 (0.72-1.55)                                | 138                       | 1.12 (0.88-1.43)                                | 48            | 1.10 (0.73-1.65)                                |
| Current                                                                                                            | 378                        | 0.94 (0.76-1.18)                                | 112           | 0.98 (0.71-1.36)                                | 260                       | 1.31 (1.06-1.61)                                | 87            | 1.09 (0.77-1.54)                                |
| p-heterogeneity                                                                                                    |                            |                                                 |               | 0.59                                            |                           |                                                 |               | 0.60                                            |
| <b>Duration (years)</b>                                                                                            |                            |                                                 |               |                                                 |                           |                                                 |               |                                                 |
| <1                                                                                                                 | 189                        | 1.00 (ref)                                      | 109           | 1.00 (ref)                                      | 204                       | 1.00 (ref)                                      | 77            | 1.00 (ref)                                      |
| 1-4                                                                                                                | 97                         | 0.93 (0.72-1.20)                                | 46            | 1.05 (0.73-1.50)                                | 153                       | 1.19 (0.96-1.48)                                | 75            | 1.39 (0.99-1.94)                                |
| 5-9                                                                                                                | 113                        | 1.05 (0.81-1.36)                                | 40            | 1.23 (0.82-1.84)                                | 133                       | 1.40 (1.10-1.77)                                | 36            | 0.92 (0.60-1.41)                                |
| 10-15 <sup>b</sup>                                                                                                 | 75                         | 1.05 (0.78-1.42)                                | 18            | 1.05 (0.61-1.81)                                | 95                        | 1.61 (1.21-2.14)                                | 23            | 1.00 (0.59-1.70)                                |
| ≥15                                                                                                                | 166                        | 1.11 (0.86-1.42)                                | 38            | 1.16 (0.74-1.80)                                | --                        | --                                              | --            | --                                              |
| p-trend                                                                                                            |                            | 0.30                                            |               | 0.51                                            |                           | 0.001                                           |               | 0.51                                            |
| p-heterogeneity                                                                                                    |                            |                                                 |               | 0.95                                            |                           |                                                 |               | 0.02                                            |
| <b>Days per week (cumulative average)<sup>c</sup></b>                                                              |                            |                                                 |               |                                                 |                           |                                                 |               |                                                 |
| <2                                                                                                                 | 413                        | 1.00 (ref)                                      | 160           | 1.00 (ref)                                      | 425                       | 1.00 (ref)                                      | 146           | 1.00 (ref)                                      |
| 3-4                                                                                                                | 184                        | 1.02 (0.85-1.23)                                | 48            | 1.09 (0.77-1.53)                                | 98                        | 1.17 (0.94-1.47)                                | 29            | 0.85 (0.57-1.28)                                |
| ≥5                                                                                                                 | 45                         | 0.84 (0.61-1.14)                                | 113           | 0.95 (0.53-1.70)                                | 43                        | 1.25 (0.91-1.72)                                | 8             | 0.68 (0.33-1.40)                                |
| p-trend                                                                                                            |                            | 0.48                                            |               | 0.89                                            |                           | 0.07                                            |               | 0.21                                            |
| p-heterogeneity                                                                                                    |                            |                                                 |               | 0.65                                            |                           |                                                 |               | 0.05                                            |
| <b>Tablets per week (cumulative average)<sup>c</sup></b>                                                           |                            |                                                 |               |                                                 |                           |                                                 |               |                                                 |
| <1                                                                                                                 | 269                        | 1.00 (ref)                                      | 100           | 1.00 (ref)                                      | 109                       | 1.00 (ref)                                      | 37            | 1.00 (ref)                                      |
| 1-3                                                                                                                | 238                        | 1.17 (0.98-1.41)                                | 60            | 1.12 (0.79-1.57)                                | 55                        | 1.40 (1.00-1.96)                                | 16            | 0.92 (0.50-1.67)                                |
| 4-5                                                                                                                | 76                         | 1.23 (0.94-1.59)                                | 27            | 1.55 (1.00-2.40)                                | 31                        | 1.48 (0.98-2.23)                                | 9             | 0.88 (0.42-1.84)                                |
| 6-9                                                                                                                | 63                         | 1.10 (0.83-1.46)                                | 11            | 0.78 (0.41-1.48)                                | 26                        | 1.52 (0.97-2.38)                                | 8             | 1.18 (0.54-2.62)                                |
| ≥10                                                                                                                | 43                         | 0.96 (0.69-1.33)                                | 20            | 1.30 (0.79-2.13)                                | 55                        | 1.65 (1.18-2.31)                                | 16            | 1.08 (0.59-1.98)                                |
| p-trend                                                                                                            |                            | 0.91                                            |               | 0.40                                            |                           | 0.003                                           |               | 0.69                                            |
| p-heterogeneity                                                                                                    |                            |                                                 |               | 0.51                                            |                           |                                                 |               | 0.29                                            |

<sup>a</sup>Models allowed for variation in baseline hazards by cohort, age in months (continuous) and calendar years (continuous), and adjusted for menopausal status, parity (ever/never and number of children), duration of oral contraceptive use (never, <1, 1 to 5, >5 years), duration of postmenopausal hormone use by type, history of tubal ligation (yes, no), history of hysterectomy (yes, no), family history of breast cancer or ovarian cancer (yes, no), BMI (<20, 20 to <25, 25 to <30, ≥30)



<sup>b</sup>Top category of duration analysis for NSAIDs is  $\geq 10$  years

<sup>c</sup>Aspirin days per week follow-up 1984-2015; NSAID tablets per week follow-up 2000-2015

| <b>eTable 5. Acetaminophen and risk of ovarian cancer in the Nurses' Health Studies, by tumor histotype</b> |                |                                                |               |                                                |
|-------------------------------------------------------------------------------------------------------------|----------------|------------------------------------------------|---------------|------------------------------------------------|
|                                                                                                             | <b>Type II</b> |                                                | <b>Type I</b> |                                                |
|                                                                                                             | Cases          | Multivariate-adjusted HR (95% CI) <sup>a</sup> | Cases         | Multivariate-adjusted HR (95% CI) <sup>a</sup> |
| <b>Current regular use</b>                                                                                  |                |                                                |               |                                                |
| None                                                                                                        | 189            | 1.00 (ref)                                     | 91            | 1.00 (ref)                                     |
| Past                                                                                                        | 189            | 1.20 (0.96-1.49)                               | 58            | 0.89 (0.62-1.28)                               |
| Current                                                                                                     | 180            | 1.17 (0.94-1.44)                               | 49            | 0.78 (0.55-1.12)                               |
| p-heterogeneity                                                                                             |                |                                                |               | 0.14                                           |
| <b>Duration (years)</b>                                                                                     |                |                                                |               |                                                |
| <1                                                                                                          | 226            | 1.00 (ref)                                     | 104           | 1.00 (ref)                                     |
| 1-4                                                                                                         | 174            | 1.18 (0.96-1.44)                               | 53            | 0.81 (0.57-1.13)                               |
| 5-9                                                                                                         | 132            | 1.32 (1.06-1.66)                               | 42            | 1.03 (0.71-1.50)                               |
| ≥10                                                                                                         | 53             | 1.20 (0.87-1.66)                               | 13            | 0.81 (0.44-1.48)                               |
| p-trend                                                                                                     |                | 0.09                                           |               | 0.76                                           |
| p-heterogeneity                                                                                             |                |                                                |               | 0.28                                           |
| <b>Days per week (cumulative average)</b>                                                                   |                |                                                |               |                                                |
| <2                                                                                                          | 483            | 1.00 (ref)                                     | 162           | 1.00 (ref)                                     |
| 3-4                                                                                                         | 57             | 0.98 (0.74-1.29)                               | 18            | 0.97 (0.60-1.59)                               |
| ≥5                                                                                                          | 16             | 1.02 (0.62-1.68)                               | 2             | 0.43 (0.11-1.73)                               |
| p-trend                                                                                                     |                | 0.96                                           |               | 0.35                                           |
| p-heterogeneity                                                                                             |                |                                                |               | 0.41                                           |
| <b>Tablets per week (cumulative average)<sup>b</sup></b>                                                    |                |                                                |               |                                                |
| <1                                                                                                          | 139            | 1.00 (ref)                                     | 59            | 1.00 (ref)                                     |
| 1-3                                                                                                         | 58             | 1.32 (0.96-1.80)                               | 11            | 0.60 (0.31-1.15)                               |
| 4-5                                                                                                         | 23             | 1.20 (0.76-1.88)                               | 8             | 1.09 (0.52-2.29)                               |
| 6-9                                                                                                         | 15             | 1.19 (0.69-2.05)                               | 6             | 1.9 (0.63-3.54)                                |
| ≥10                                                                                                         | 30             | 1.33 (0.89-2.00)                               | 7             | 0.78 (0.35-1.74)                               |
| p-trend                                                                                                     |                | 0.15                                           |               | 0.87                                           |
| p-heterogeneity                                                                                             |                |                                                |               | 0.41                                           |

<sup>a</sup>Models allowed for variation in baseline hazards by cohort, age in months (continuous) and calendar years (continuous), and adjusted for menopausal status, parity (ever/never and number of children), duration of oral contraceptive use (never, <1, 1 to 5, >5 years), duration of postmenopausal hormone use by type, history of tubal ligation (yes, no), history of hysterectomy (yes, no), family history of breast cancer or ovarian cancer (yes, no), BMI (<20, 20 to <25, 25 to <30, ≥30)

<sup>b</sup> Cumulative average tablets per week follow-up 2000-2015
